# Supplementary material for: Design and validation of multi-stage expressing mRNA vaccine for Mycobacterium tuberculosis through computational technology
Source: Research Square preprint supplement (doi:10.21203/rs.3.rs-6579802/v1), 2025-10-17
Supplement: Supplementary file 1 [file 4c8f9aede4980f9d10c42f4b.docx]

**Supplementary Data**

**Table S1. Prediction based results of promiscuous antigenic epitopes from selected stage specific Mtb proteins**

| **Server** | **Parameter** | **Mce4A** | **Mce4F** | **Rv3875** | **Rv3874** | **Rv1980c** | **Rv2006** | **Rv1733c** | **Rv1738** | **Rv1759c** |
| --- | --- | --- | --- | --- | --- | --- | --- | --- | --- | --- |
| NetMHC4.0  [Prediction of MHC Class I binders] | **No. of overlapping nonamers** | 392 | 556 | 87 | 92 | 220 | 1319 | 202 | 86 | 906 |
| **Total no. of binding Epitopes** | 245 | 245 | 45 | 41 | 245 | 845 | 128 | 56 | 232 |
| **Total no. of Promiscuous epitopes** | 108 | 108 | 23 | 20 | 153 | 597 | 80 | 33 | 109 |
| **No. of promiscuous antigenic epitopes** | 77 | 77 | 15 | 16 | 77 | 320 | 43 | 17 | 72 |
| IEDB [Prediction of MHC Class II binders] | **No. of overlapping nonamers** | 392 | 556 | 87 | 92 | 220 | 1319 | 202 | 86 | 906 |
| **Total no. of binding Epitopes** | 116 | 158 | 15 | 14 | 50 | 325 | 53 | 18 | 101 |
| **Total no. of Promiscuous epitopes** | 26 | 26 | 2 | 1 | 11 | 179 | 13 | 4 | 14 |
| **No. of promiscuous antigenic epitopes** | 8 | 12 | 2 | 1 | 3 | 94 | 5 | 2 | 7 |
| NetMHC4.0  And IEDB | **Overlapping**  **(MHC I and II)Promiscuous antigenic epitopes** | 7 | 6 | 2 | - | - | 25 | 3 | 2 | 7 |

Mce4F generated more overlapping nonamers than Mce4A because of its large size. Using NETMHC4.0, both of these proteins generated same number of MHC class I restricted epitopes, promiscuous epitopes and promiscuous antigenic epitopes. Using IEDB server, Mce4F generated more MHC class II restricted epitopes as well as promiscuous antigenic epitopes than Mce4A. Rv2006 protein generated maximum number of overlapping nonamers as well as promiscuous antigenic epitopes, among all the seven proteins whereas Rv3875 generated least number of binding epitopes for both MHC class I and II. Common promiscuous epitopes for MHC class I and class II were numerous in Rv2006 and Rv1759c whereas Rv3874 and 1980c generated no common promiscuous antigenic epitope.

**Table S2. Characteristics of shortlisted epitopes used for vaccine designing**

| **Proteins** | **Epitopes** | **Vaxijen Score** | **Pro-inflammatory** | **Anti-inflammatory** | **No. of Binders**  **MHCclass I(I) and MHC class II(II)** | **Class I Alleles** | **Class II Alleles** |
| --- | --- | --- | --- | --- | --- | --- | --- |
| Rv3874 | EMKTDAATL | 1.282 | 0.4753 | 0.3814 | I=10,II=0 | HLA-A*02:50 , HLA-A*25:01, HLA-B*08:01, HLA-B*08:02, HLA-B*08:03 , HLA-B*15:03 , HLA-B*15:09, HLA-B*35:03, HLA-B*39:01, HLA-C*04:01 , HLA-C*07:02, HLA-C*14:02, HLA-E*01:01 | - |
| Rv3875 | MTEQQWNFA | 0.6826 | 0.5065 | 0.3628 | I=7,II=0 | HLA-A*01:01, HLA-A*30:01, HLA-A*66:01, HLA-A*68:02, HLA-A*68:23, HLA-A*69:01, HLA-C*05:01 |  |
| Rv1980c | TSVRVAAAL | 0.82 | 0.6328 | 0.5209 | I=16,II=0 | HLA-A*26:02, HLA-A*68:02, HLA-A*69:01, HLA-B*15:09, HLA-B*42:01, HLA-B*46:01, HLA-B*48:01, HLA-B*57:01, HLA-B*58:01, HLA-C*03:03, HLA-C*14:02, HLA-C*15:02 |  |
|  | YNINISLPS | 1.6693 | 0.6008 | 0.5349 | I=0 ,II=7 |  | HLA-DRB1*04:01, HLA-DRB1*09:01, HLA-DRB1*04:05, HLA-DRB1*04:04, HLA-DRB1*12:01, HLA-DRB1*13:02, HLA-DRB1*15:01 |
| Rv2006 | LSAVVHAWV | 0.5624 | 0.5642 | 0.5163 | I= 6 ,II=3 | HLA-A*68:02, HLA-A*69:01, HLA-B*15:17, HLA-B*58:01, HLA-C*05:01, HLA-C*15:02 | HLA-DRB1*09:01, HLA-DRB1*01:01, HLA-DRB1*07:01 |
|  | YRQLSSQHL | 0.6968 | 0.573 | 0.3535 | I= 13 , II=10 | HLA-B*08:03, HLA-B*14:02, HLA-B*15:03, HLA-B*15:09, HLA-B*27:05, HLA-B*27:20, HLA-B*39:01, HLA-B*48:01, HLA-B*73:01, HLA-C*06:02, HLA-C*07:01, HLA-C*07:02, HLA-C*14:02 | HLA-DRB1*01:01, HLA-DRB1*07:01, HLA-DRB1*09:01, HLA-DRB1*11:01, HLA-DRB1*15:01, HLA-DRB5*01:01, HLA-DRB4*01:01, HLA-DRB1*04:01, HLA-DRB1*04:04, HLA-DRB1*04:05 |
| Rv1738 | IEAVTHQPA | 0.4704 | 0.5346 | 0.4512 | I=4,II=3 | HLA-B*40:02, HLA-B*45:01, HLA-B*18:01, HLA-B*40:01 | HLA-DRB4*01:01, HLA-DRB1*08:02, HLA-DRB1*09:01 |
|  | VLQHWTVDI | 0.6122 | 0.5447 | 0.4209 | I=13,II=0 | HLA-A*02:19 , HLA-C*07:01, HLA-C*08:02, HLA-A*02:01, HLA-A*02:03, HLA-A*02:05, HLA-A*02:11, HLA-A*02:12, HLA-A*02:16, HLA-A*02:17 , HLA-A*02:50 , HLA-A*32:01, HLA-A*32:01, HLA-A*32:07 |  |
| Rv1733c | IADAALAAL | 0.4038 | 0.5186 | 0.4651 | I=13,II=0 | HLA-A*02:06,  HLA-A*69:01,  HLA-B*14:02,  HLA-B*15:09,  HLA-B*35:01 , HLA-B*35:03,  HLA-B*39:01,  HLA-B*48:01,  HLA-C*03:03,  HLA-C*05:01,  HLA-C*08:02,  HLA-C*12:03,  HLA-C*15:02 |  |
|  | ATSAPPRTK | 0.8273 | 0.5278 | 0.4047 | I=3,II=0 | HLA-A*03:01, HLA-A*11:01, HLA-A*30:01 |  |
| Rv1759c | YAAAEAAAV | 0.6356 | 0.5149 | 0.5 | I=23,II=5 |  | HLA-DRB1*01:01, HLA-DRB1*04:01, HLA-DRB1*07:01, HLA-DRB1*09:01, HLA-DRB5*01:01 |
|  | EAAAVTPLL | 0.5504 | 0.5670 | 0.5442 | I=16,II=1 | HLA-A*26:01, HLA-A*26:02, HLA-A*66:01, HLA-A*66:01, HLA-A*68:02, HLA-A*68:23, HLA-A*69:01, HLA-B*14:02, HLA-B*35:01, HLA-B*39:01, HLA-B*48:01, HLA-B*51:01, HLA-B*53:01, HLA-B*58:01, HLA-C*03:03, HLA-C*04:01, HLA-E*01:01 | HLA-DRB1*01:01 |
| Mce4A | VQLEVNTLF | 0.6468 | 0.6243 | 0.4442 | I=17  II=3 | HLA-A*02:06,HLA-A*23:01,HLA-A*24:02,HLA-A*32:01,HLA-A*32:07,HLA-A*66:01,  HLA-B*08:03,HLA-B*15:01,HLA-B*15:02,HLA-B*15:03,HLA-B*18:01,HLA-B*38:01,  HLA-B*40:13,HLA-B*48:01,HLA-B*58:02,  HLA-C*04:01,HLA-C*05:01 | HLA-DRB1*03:01,  HLA-DRB1*04:04,  HLA-DRB1*04:01 |
|  | TSVRVAAAL | 0.82 | 0.5945 | 0.5209 | I=16  II=0 | HLA-A*26:02, HLA-A*68:02, HLA-A*69:01, HLA-B*08:02, HLA-B*14:02, HLA-B*15:09, HLA-B*15:17, HLA-B*39:01, HLA-B*42:01¸ HLA-B*46:01, HLA-B*48:01, HLA-B*57:01, HLA-B*58:01, HLA-C*03:03, HLA-C*14:02, HLA-C*15:02 | - |
|  | RQANPKLPA | 1.1125 | 0.5543 | 0.3791 | I=8  II=0 | HLA-A*02:06, HLA-A*66:01, HLA-B*15:01, HLA-B*15:03, HLA-B*27:20, HLA-B*40:13, HLA-B*48:01, HLA-B*83:01 | - |
| Mce4F | FPALAASLA | 0.793 | 0.5358 | 0.5209 | I=9  II=6 | HLA-B*07:02, HLA-B*15:09, HLA-B*35:01, HLA-B*35:03, HLA-B*39:01, HLA-B*42:01, HLA-B*51:01, HLA-B*54:01, HLA-B*83:01 | HLA-DRB1*01:01, HLA-DRB1*09:01, HLA-DRB1*04:04, HLA-DRB1*08:02, HLA-DRB1*04:01, HLA-DRB1*04:05, HLA-DRB1*01:01,HLA-DRB1*09:01, HLA-DRB1*04:04 |
|  | LLVVFPALF | 2.1352 | 0.5332 | 0.5209 | I=8  II=9 | HLA-A*23:01, HLA-A*29:02, HLA-B*08:02, HLA-B*08:03, HLA-B*15:01, HLA-B*15:02, HLA-B*15:03, HLA-B*58:01 | HLA-DRB1*08:02, HLA-DRB1*01:01, HLA-DRB1*09:01, HLA-DRB1*04:05, HLA-DRB1*07:01, HLA-DRB1*04:01, HLA-DRB1*15:01, HLA-DRB1*12:01, HLA-DRB5*01:01 |
|  | LVVFPALFA | 1.5953 | 0.4998 | 0.4256 | I=3  II=4 | HLA-A*66:01, HLA-A*68:02, HLA-A*69:01 | HLA-DRB1*04:04, HLA-DRB1*09:01, HLA-DRB1*08:02, HLA-DRB1*04:01 |

Predicted binding of 18 promiscuous antigenic epitopes with MHC Class I and MHC Class II along with their vaxijen score, pro-inflammatory score and anti-inflammatory score. Peptide ‘YRQLSSQHL’ of Rv2006 was found to bind with maximum 13 MHC Class I alleles and 10 MHC Class II alleles.

**Table S3. TLR2 and TLR4 specified LRR regions interaction of the designed vaccine**

| **Vaccine Residue** | **TLR type** | **TLR Residue** | **Bond type** | **LRR region** | **Vaccine Residue Interacted** |
| --- | --- | --- | --- | --- | --- |
| Glu216 | TLR2 | Arg155 | H- Bond;Electrostatic | LRR5 | Rv1759c |
| Asp120 | TLR2 | Lys347 | Electrostatic | - | Rv3874 |
| Tyr211 | TLR2 | Ser60 | H- Bond | LRR1 | AAY Linker |
| Ala219 | TLR2 | Tyr109 | H- Bond | LRR3 | Rv1759c |
| Tyr212 | TLR2 | Arg155 | H- Bond | LRR5 | Rv1759c |
| Tyr223 | TLR2 | Ser184 | H- Bond | LRR6 | AAY Linker |
| Tyr127 | TLR2 | Lys422 | H- Bond | LRR15 | AAY Linker |
| Gln2 | TLR2 | Arg447 | H- Bond | LRR16 | Mce4A |
| His179 | TLR2 | Asn258 | H- Bond | LRR9 | Rv1738 |
| Tyr211 | TLR2 | Asp58 | H- Bond | LRR1 | AAY Linker |
| Tyr223 | TLR2 | Asp231 | H- Bond | - | AAY Linker |
| Tyr151 | TLR2 | Lys37 | H- Bond;Electrostatic | - | AAY Linker |
| Tyr187 | TLR2 | Arg257 | Electrostatic | LRR9 | AAY Linker |
| His179 | TLR2 | Asn258 | H-Bond | LRR9 | Rv1738 |
| Phe64 | TLR2 | Gln396 | H-bond | LRR14 | Mce4F |
| Tyr223 | TLR2 | Met159 | Hydrophobic | LRR5 | AAY Linker |
| Val148 | TLR2 | Lys37 | Hydrophobic | - | Rv2006 |
| Val182 | TLR2 | Arg316 | Hydrophobic | LRR11 | Rv1738 |
| Ala150 | TLR2 | Lys37 | Hydrophobic | - | Mce4F |
| Ala226 | TLR2 | Met159 | Hydrophobic | LRR5 | Rv1759c |
| Ala219 | TLR2 | Tyr109 | Hydrophobic | LRR3 | Rv1759c |
| Ala222 | TLR2 | Tyr109 | Hydrophobic | LRR3 | AAY linker |
| Val176 | TLR2 | His318 | Hydrophobic | LRR11 | Rv1738 |
| Leu177 | TLR2 | His318 | Hydrophobic | LRR11 | Rv1738 |
| Tyr151 | TLR2 | Lys37 | Hydrophobic | - | AAY linker |
| Thr119 | TLR4 | Val32 | H-bond | LRR2 | Rv3874 |
| Lys208 | TLR4 | Gly267 | H-bond | LRR11 | Rv1733c |
| Lys208 | TLR4 | Asn268 | H-bond | LRR11 | Rv1733c |
| Tyr104 | TLR4 | His552 | H-bond | LRR23 | Rv1980c |
| Lys208 | TLR4 | Asp294 | H-bond/ Electrostatic | LRR12 | Rv1733c |
| Tyr212 | TLR4 | Phe263 | Hydrophobic | LRR11 | Rv1759c |
| Leu232 | TLR4 | Phe500 | Hydrophobic | LRR21 | Rv1759c |
| Tyr212 | TLR4 | Leu293 | Hydrophobic | LRR12 | Rv1759c |

Our designed vaccine residues show strong interaction with TLR2 and TLR4 involving hydrogen bond(H-bond), electrostatic and hydrophobic bond. Most of the interactions involved hydrogen bonding. Various LRRs regions were also analysed in which TLR2 involve 19 LRR regions and TLR4 involve 8 LRR regions specified interactions. Selected epitopes involved in interaction were also identified.
